# Supplementary material for: Analysis of the structural quality of the CASD-NMR 2013 entries
Source: PubMed Central journal article supplement (PMC4569653; doi:10.1007/s10858-015-9949-0), 2015-06-03
Supplement: 10858_2015_9949_MOESM1_ESM.pdf [file 10858_2015_9949_MOESM1_ESM.pdf]

Supplementary Table 1.

| EntryID | Target  | Program Type          | Entry                            | Invalid | Conformers | Accuracy | Convergence | ROG    | NOE completeness | DP Score | W packing quality | MP Clash Z-score | MP Clash score (pdb style) | W Ramachandra n appearance | MP Ramachandra n disallowed | PC_NMR $\phi/\psi$ Z-score | W X Z | PC_NMR dihedral Z-score | Intra-NOEs | Seq-NOEs | Med-NOEs | Long-NOEs | Ambig-NOEs | Queen Information | NOE violations >0.1 Å | NOE violations >0.3 Å | NOE violations >0.5 Å | dihedrals | dihedral violations >1° | dihedral violations >3° | dihedral violations >5° | RDCs |
|---------|---------|-----------------------|----------------------------------|---------|------------|----------|-------------|--------|------------------|----------|-------------------|------------------|----------------------------|----------------------------|-----------------------------|----------------------------|-------|-------------------------|------------|----------|----------|-----------|------------|-------------------|-----------------------|-----------------------|-----------------------|-----------|-------------------------|-------------------------|-------------------------|------|
| HR2876B | HR2876B |                       | HR2876B                          |         | 20         | 0.62     | green       | 73.2   | 0.93             | 2.10     | 0.02              | 9.06             | -1.93                      | 0                          | -0.04                       | -0.44                      | -0.30 | 699                     | 519        | 1147     | 0        | 66.278    | 119        | 11                | 0                     | 112                   | 81                    | 38        | 15                      | 0                       |                         |      |
| 255     | HR2876B | ARIA                  | HR2876B_ARIA_c                   |         | 10         | 0.72     | 0.36        | green  | 75.2             | 0.93     | 2.09              | -0.74            | 12.36                      | -1.55                      | 2.1                         | -0.35                      | -0.45 | -0.53                   | 619        | 1333     | 451      | 942       | 580        | 45.138            | 208                   | 112                   | 53                    | 172       | 173                     | 91                      | 59                      | 0    |
| 256     | HR2876B | ARIA                  | HR2876B_ARIA_cr                  |         | 10         | 0.78     | 0.53        | green  | 75.5             | 0.93     | 2.00              | -1.32            | 16.63                      | -2.24                      | 3.4                         | -0.98                      | -0.67 | -1.06                   | 627        | 1340     | 447      | 946       | 609        | 75.970            | 315                   | 202                   | 143                   | 172       | 272                     | 170                     | 138                     | 121  |
| 240     | HR2876B | ARIA                  | HR2876B_ARIA_ur                  |         | 10         | 0.91     | 0.58        | green  | 74.4             | 0.90     | 2.42              | -3.56            | 27.49                      | -2.23                      | 1.6                         | -0.98                      | -2.37 | -1.54                   | 1041       | 1224     | 1024     | 2180      | 1447       | 66.538            | 7755                  | 6749                  | 5793                  | 172       | 267                     | 175                     | 107                     | 0    |
| 241     | HR2876B | ARIA                  | HR2876B_ARIA_ur                  |         | 10         | 1.05     | 0.70        | green  | 74.5             | 0.91     | 1.72              | -4.18            | 31.03                      | -3.06                      | 2.4                         | -1.77                      | -2.14 | -2.37                   | 1057       | 1201     | 1067     | 2132      | 1461       | 80.438            | 7473                  | 6483                  | 5580                  | 172       | 497                     | 345                     | 257                     | 121  |
| 313     | HR2876B | ASDP-CNS              | HR2876B_ASDP-CNS_c               |         | 20         | 0.97     | 0.54        | green  | 66.4             | 0.92     | 2.05              | -1.70            | 21.32                      | -1.82                      | 0.1                         | -0.59                      | -1.51 | -1.01                   | 493        | 441      | 381      | 759       | 0          | 87.979            | 85                    | 0                     | 0                     | 164       | 362                     | 116                     | 64                      | 0    |
| 278     | HR2876B | ASDP-CNS              | HR2876B_ASDP-CNS_ur              |         | 15         | 1.00     | 0.82        | green  | 67.1             | 0.91     | 1.35              | -0.92            | 15.57                      | -2.41                      | 0.1                         | -0.55                      | -2.95 | -1.42                   | 569        | 429      | 440      | 809       | 0          | 75.689            | 189                   | 9                     | 0                     | 164       | 422                     | 210                     | 118                     | 120  |
| 314     | HR2876B | ASDP-Rosetta          | HR2876B_ASDP-Rosetta_c           |         | 20         | 0.76     | 0.38        | green  | 66.8             | 0.93     | 2.36              | -0.66            | 4.96                       | -0.03                      | 0                           | 0.24                       | 5.00  | 1.12                    | 500        | 440      | 387      | 751       | 0          | 94.678            | 104                   | 36                    | 9                     | 164       | 198                     | 167                     | 142                     | 0    |
| 279     | HR2876B | ASDP-Rosetta          | HR2876B_ASDP-Rosetta_ur          |         | 20         | 0.88     | 0.53        | green  | 66.2             | 0.92     | 2.04              | -0.22            | 10.32                      | -0.42                      | 0                           | 0.28                       | 2.86  | 0.83                    | 569        | 429      | 440      | 809       | 0          | 75.689            | 466                   | 309                   | 221                   | 164       | 183                     | 118                     | 88                      | 120  |
| 244     | HR2876B | autonee-Rosetta-alpha | HR2876B_autonee-Rosetta-alpha_ur |         | 10         | 1.50     | 1.17        | green  | 1.77             | 0.99     | 2.78              | -1.36            |                            |                            | 0.8                         | -0.59                      | 5.07  | 0.41                    | 0          | 0        | 0        | 0         | 0          | 0                 | 0                     | 0                     | 0                     | 0         | 0                       | 0                       | 0                       | 0    |
| 325     | HR2876B | Cheshire              | HR2876B_Cheshire_s               |         | 10         | 3.06     | 3.19        | green  | 0.37             |          | 8.21              | -3.47            |                            |                            |                             | -1.09                      |       |                         | 0          | 0        | 0        | 0         | 0          | 0                 | 0                     | 0                     | 0                     | 0         | 0                       | 0                       | 0                       |      |
| 326     | HR2876B | Cheshire-YAPP         | HR2876B_Cheshire-YAPP_c          |         | 50         | 0.80     | 0.46        | orange | 0.93             | 0.60     | 19.36             | -5.16            |                            |                            |                             | -6.86                      |       |                         | 0          | 0        | 0        | 0         | 0          | 0                 | 0                     | 0                     | 0                     | 0         | 0                       | 0                       | 0                       |      |
| 262     | HR2876B | Cheshire-YAPP         | HR2876B_Cheshire-YAPP_u          |         | 100        | 1.00     | 0.48        | orange | 0.91             | 1.52     | -10.04            | 30.71            | -3.21                      |                            | 1.6                         | -1.57                      | -7.20 | -4.91                   | 0          | 0        | 0        | 0         | 0          | 0                 | 0                     | 0                     | 0                     | 0         | 0                       | 0                       | 0                       | 0    |
| 283     | HR2876B | CS-HM-Rosetta         | HR2876B_CS-HM-Rosetta_sr         |         | 1          | 2.30     |             | orange |                  |          | -1.72             |                  | -2.19                      |                            |                             | 6.46                       |       |                         | 0          | 0        | 0        | 0         | 0          | 0                 | 0                     | 0                     | 0                     | 0         | 0                       | 0                       | 0                       |      |
| 259     | HR2876B | CYANA                 | HR2876B_CYANA_c                  |         | 20         | 0.71     | 0.38        | green  | 76.1             | 0.93     | 1.79              | 0.67             | 5.13                       | -2.57                      | 0.1                         | -1.02                      | -4.08 | -2.31                   | 675        | 592      | 525      | 1184      | 0          | 90.712            | 22                    | 0                     | 0                     | 0         | 0                       | 0                       | 0                       | 0    |
| 227     | HR2876B | Ponderosa             | HR2876B_Ponderosa_r              |         | 20         | 1.29     | 0.11        | orange | 0.89             | 0.52     | -2.24             | 23.86            | -0.55                      |                            | 1                           | -0.35                      | -6.03 | -2.42                   | 577        | 482      | 380      | 795       | 0          | 67.914            | 64                    | 0                     | 0                     | 316       | 513                     | 417                     | 366                     | 0    |
| 239     | HR2876B | UNIO                  | HR2876B_UNIO_r                   |         | 20         | 1.05     | 0.58        | orange | 64.8             | 0.89     | 0.27              | -5.09            | 36.05                      | -4.78                      | 0.4                         | -2.52                      | -6.63 | -5.14                   | 462        | 435      | 265      | 579       | 0          | 66.952            | 238                   | 51                    | 27                    | 274       | 1092                    | 956                     | 851                     | 0    |
| 238     | HR2876B | UNIO                  | HR2876B_UNIO_u                   |         | 20         | 1.03     | 0.45        | red    | 55.8             | 0.87     | 0.84              | -12.88           | 75.19                      | -5.56                      | 3.1                         | -3.62                      | -6.74 | -6.39                   | 795        | 405      | 617      | 1228      | 0          | 88.163            | 521                   | 134                   | 82                    | 274       | 1279                    | 1091                    | 958                     | 0    |
| HR2876C | HR2876C |                       | HR2876C                          |         | 20         | 0.97     | 0.54        | green  | 68.0             | 0.89     | 2.41              | -6.13            | 20.75                      | -1.70                      | 0                           | 0.32                       | -0.39 | 0.34                    | 744        | 648      | 739      | 907       | 0          | 54.959            | 105                   | 2                     | 0                     | 124       | 302                     | 78                      | 7                       | 0    |
| 303     | HR2876C | ARIA                  | HR2876C_ARIA_cr                  |         | 15         | 1.05     | 0.12        | green  | 63.5             | 0.90     | 2.39              | -1.23            | 20.13                      | -1.32                      | 2.8                         | -0.39                      | -0.70 | -0.47                   | 431        | 1008     | 451      | 500       | 325        | 54.387            | 94                    | 19                    | 12                    | 140       | 251                     | 175                     | 152                     | 95   |
| 304     | HR2876C | ARIA                  | HR2876C_ARIA_cr(10-97)           |         | 15         | 1.05     | 0.12        | green  | 63.5             | 0.90     | 2.39              | -1.23            | 20.13                      | -1.32                      | 2.8                         | -0.39                      | -0.70 | -0.47                   | 431        | 1008     | 451      | 500       | 325        | 54.387            | 94                    | 19                    | 12                    | 140       | 240                     | 164                     | 142                     | 95   |
| 296     | HR2876C | ARIA                  | HR2876C_ARIA_ur                  |         | 15         | 0.81     | 0.42        | green  | 61.4             | 0.86     | 3.18              | -2.23            | 26.59                      | -0.18                      | 0.1                         | -0.04                      | -0.42 | -0.18                   | 664        | 936      | 688      | 795       | 440        | 72.045            | 1434                  | 478                   | 169                   | 140       | 280                     | 159                     | 141                     | 95   |
| 307     | HR2876C | ASDP-Rosetta          | HR2876C_ASDP-Rosetta_cr          |         | 20         | 0.76     | 0.51        | green  | 62.2             | 0.89     | 2.91              | -0.02            | 8.87                       | 0.93                       | 0                           | 0.79                       | 3.91  | 1.77                    | 529        | 425      | 515      | 506       | 0          | 82.340            | 1311                  | 426                   | 111                   | 158       | 200                     | 121                     | 85                      | 0    |
| 301     | HR2876C | ASDP-Rosetta          | HR2876C_ASDP-Rosetta_ur          |         | 20         | 1.41     | 0.65        | green  | 58.2             | 0.83     | 1.93              | -1.20            | 15.18                      | -0.07                      | 0                           | 0.67                       | 2.08  | 1.12                    | 569        | 393      | 507      | 443       | 0          | 80.670            | 1299                  | 557                   | 229                   | 158       | 334                     | 251                     | 184                     | 0    |
| 288     | HR2876C | autonee-Rosetta-alpha | HR2876C_autonee-Rosetta-alpha_ur |         | 10         | 1.16     | 0.79        | green  | 0.85             | 3.18     | 0.92              | 3.69             | 0.45                       | 0                          | 0                           | 0.79                       | 6.20  | 2.19                    | 0          | 0        | 0        | 0         | 0          | 0                 | 0                     | 0                     | 0                     | 0         | 0                       | 0                       | 0                       | 0    |
| 310     | HR2876C | BE-metadynamics       | HR2876C_BE-metadynamics_s        |         | 28         | 1.68     | 1.66        | green  | 0.77             | 0.70     | 1.13              | 2.35             | -3.97                      |                            | 0.4                         | -1.06                      | -4.91 | -2.07                   | 0          | 0        | 0        | 0         | 0          | 0                 | 0                     | 0                     | 0                     | 0         | 0                       | 0                       | 0                       |      |
| 309     | HR2876C | Cheshire              | HR2876C_Cheshire_s               |         | 10         | 1.84     | 1.32        | green  | 2.05             | -1.70    | 19.03             | -2.14            |                            |                            | 0.6                         | -0.04                      | -0.68 | 0.06                    | 0          | 0        | 0        | 0         | 0          | 0                 | 0                     | 0                     | 0                     | 0         | 0                       | 0                       | 0                       | 0    |
| 308     | HR2876C | Cheshire-YAPP         | HR2876C_Cheshire-YAPP_c          |         | 50         | 1.05     | 0.56        | red    | 0.90             | 1.68     | -5.08             | 32.06            | -5.05                      |                            | 1.3                         | -2.36                      | -7.62 | -5.03                   | 0          | 0        | 0        | 0         | 0          | 0                 | 0                     | 0                     | 0                     | 0         | 0                       | 0                       | 0                       | 0    |
| 300     | HR2876C | Cheshire-YAPP         | HR2876C_Cheshire-YAPP_u          |         | 50         | 2.07     | 1.14        | red    | 0.85             | 0.01     | -10.58            | 58.46            | -7.18                      |                            | 4.9                         | -4.48                      | -7.74 | -7.69                   | 0          | 0        | 0        | 0         | 0          | 0                 | 0                     | 0                     | 0                     | 0         | 0                       | 0                       | 0                       | 0    |
| 291     | HR2876C | CS-HM-Rosetta         | HR2876C_CS-HM-Rosetta_sr         |         | 11         | 1.40     | 0.86        | green  | 0.81             | 1.93     | 0.89              | 3.85             | -0.18                      |                            | 0.7                         | -0.28                      | 6.08  | 0.83                    | 0          | 0        | 0        | 0         | 0          | 0                 | 0                     | 0                     | 0                     | 0         | 0                       | 0                       | 0                       | 0    |
| 285     | HR2876C | CS-HM-Rosetta         | HR2876C_CS-HM-Rosetta_ur         |         | 11         | 1.88     | 0.42        | green  | 1.99             | 0.99     | 3.80              | -3.50            |                            |                            | 0                           | 0.12                       | 6.31  | 1.24                    | 0          | 0        | 0        | 0         | 0          | 0                 | 0                     | 0                     | 0                     | 0         | 0                       | 0                       | 0                       | 0    |
| 286     | HR2876C | CS-Rosetta            | HR2876C_CS-Rosetta_s             |         | 10         | 0.86     | 0.82        | green  | 3.07             | -0.19    | 6.57              | -0.01            |                            |                            | 0                           | 0.75                       | 5.75  | 1.89                    | 0          | 0        | 0        | 0         | 0          | 0                 | 0                     | 0                     | 0                     | 0         | 0                       | 0                       | 0                       | 0    |
| 287     | HR2876C | CS-Rosetta3           | HR2876C_CS-Rosetta3_s            |         | 6          | 1.00     | 0.85        | green  | 2.70             | 0.55     | 5.91              | 0.01             |                            |                            | 0                           | 0.59                       | 6.62  | 1.83                    | 0          | 0        | 0        | 0         | 0          | 0                 | 0                     | 0                     | 0                     | 0         | 0                       | 0                       | 0                       | 0    |
| 302     | HR2876C | CYANA                 | HR2876C_CYANA_c                  |         | 20         | 0.84     | 0.34        | green  | 71.0             | 0.89     | 1.83              | -0.20            | 12.37                      | -2.52                      | 0                           | -0.16                      | -5.42 | -1.60                   | 739        | 607      | 735      | 940       | 0          | 73.930            | 64                    | 0                     | 0                     | 0         | 0                       | 0                       | 0                       |      |
| 297     | HR2876C | CYANA                 | HR2876C_CYANA_u                  |         | 20         | 0.97     | 0.30        | orange | 66.8             | 0.87     | 1.49              | -2.03            | 21.89                      | -4.40                      | 2.6                         | -1.65                      | -6.15 | -3.61                   | 724        | 615      | 690      | 879       | 0          | 74.135            | 111                   | 0                     | 0                     | 0         | 0                       | 0                       | 0                       | 0    |
| 305     | HR2876C | I-TASSER              | HR2876C_I-TASSER_c               |         | 1          | 1.32     |             | green  | 86.2             | 0.82     | -1.14             | -1.19            | 18.17                      | -0.50                      | 0                           | 0.04                       | -3.21 | -1.30                   | 1781       | 2253     | 1792     | 2011      | 275        | 89.898            | 216                   | 75                    | 28                    | 138       | 32                      | 24                      | 16                      | 0    |
| 298     | HR2876C | I-TASSER              | HR2876C_I-TASSER_ur              |         | 1          | 1.11     |             | green  | 86.3             | 0.76     | -1.66             | -0.03            | 10.38                      | -2.06                      | 2.3                         | -0.94                      | -2.24 | -2.07                   | 1867       | 1660     | 1970     | 2259      | 181        | 95.111            | 246                   | 121                   | 71                    | 138       | 57                      | 42                      | 37                      | 0    |
| 284     | HR2876C | Ponderosa             | HR2876C_Ponderosa_r              |         | 20         | 0.95     | 0.17        | orange | 0.83             | 1.64     | -2.66             | 27.68            | -1.14                      | 0                          | -0.04                       | -7.22                      | -2.72 | 526                     | 428        | 419      | 326      | 0         | 31.966     | 3829              | 2463                  | 1688                  | 307                   | 863       | 733                     | 621                     | 0                       |      |
| 293     | HR2876C | UNIO                  | HR2876C_UNIO_r                   |         | 20         | 1.32     | 0.63        | orange | 48.0             | 0.86     | 1.03              | -3.52            | 34.99                      | -5.13                      | 0.1                         | -1.81                      | -6.94 | -4.67                   | 404        | 406      | 314      | 348       | 0          | 55.568            | 332                   | 167                   | 108                   | 259       | 1218                    | 1017                    | 907                     | 0    |
| 294     | HR2876C | UNIO                  | HR2876C_UNIO_u                   |         | 20         | 1.12     | 0.50        | red    | 57.7             | 0.86     | 0.84              | -7.89            | 64.62                      | -6.04                      | 0.3                         | -2.91                      | -7.24 | -5.62                   |            |          |          |           |            |                   |                       |                       |                       |           |                         |                         |                         |      |



| EntryID | Target | Program Type          | Entry                           | Invalid | Conformers | Accuracy | Convergence | ROG    | NOE completeness | DP Score | WI packing quality | MP Clash Z-score | MP Clash score (pdb-style) | WI Ramachandran appearance | MP % Ramachandran disallowed | PC_NMR $\Phi/\psi$ Z-score | WI $\chi$ Z-score | PC_NMR dihedral Z-score | Intra-NOEs | Seq-NOEs | Med-NOEs | Long-NOEs | Ambig-NOEs | Queen Information | NOE violations > 0.1 Å | NOE violations > 0.3 Å | NOE violations > 0.5 Å | dihedrals | dihedral violations > 1° | dihedral violations > 3° | dihedral violations > 5° | RDCs |      |   |
|---------|--------|-----------------------|---------------------------------|---------|------------|----------|-------------|--------|------------------|----------|--------------------|------------------|----------------------------|----------------------------|------------------------------|----------------------------|-------------------|-------------------------|------------|----------|----------|-----------|------------|-------------------|------------------------|------------------------|------------------------|-----------|--------------------------|--------------------------|--------------------------|------|------|---|
| ST322   | ST322  |                       | ST322                           |         | 20         | 1.91     | 0.57        | green  | 63.4             | 0.81     | 2.38               | -0.06            | 12.63                      | -4.23                      | 0                            | -2.91                      | -3.68             | -4.02                   | 280        | 320      | 137      | 371       | 0          | 32.415            | 252                    | 1                      | 0                      | 70        | 28                       | 0                        | 0                        |      |      |   |
| 225     | ST322  | ARIA                  | ST322_ARIA_c                    |         | 10         | 2.19     | 0.51        | green  | 52.0             | 0.73     | 3.13               | -1.08            | 17.35                      | -1.60                      | 0.2                          | -2.12                      | -0.58             | -2.66                   | 218        | 694      | 111      | 232       | 893        | 31.127            | 249                    | 148                    | 87                     | 78        | 244                      | 128                      | 97                       | 0    |      |   |
| 333     | ST322  | ARIA                  | ST322_ARIA_u                    | TRUE    | 10         | 9.27     | 2.02        | orange | 62.4             | 0.51     | -4.23              |                  | 63.77                      | -5.92                      |                              | -5.54                      |                   | 742                     | 741        | 716      | 1789     | 2074      | 105.501    | 13546             | 11966                  | 10478                  | 78                     | 557       | 364                      | 254                      | 0                        |      |      |   |
| 229     | ST322  | ASDP-CNS              | ST322_ASDP-CNS_c                |         | 20         | 1.91     | 0.67        | red    | 62.7             | 0.80     | 1.05               | -0.75            | 19.92                      | -2.66                      | 0.1                          | -2.71                      | -7.79             | -6.62                   | 213        | 284      | 105      | 258       | 0          | 43.591            | 42                     | 11                     | 1                      | 92        | 368                      | 171                      | 91                       | 0    |      |   |
| 222     | ST322  | ASDP-CNS              | ST322_ASDP-CNS_u                |         | 20         | 2.85     | 1.43        | red    | 48.8             | 0.77     | 0.07               | -1.08            | 21.45                      | -2.71                      | 0                            | -1.49                      | -7.76             | -5.14                   | 237        | 247      | 79       | 143       | 0          | 39.702            | 52                     | 2                      | 0                      | 92        | 399                      | 249                      | 155                      | 0    |      |   |
| 230     | ST322  | ASDP-Rosetta          | ST322_ASDP-Rosetta_c            |         | 20         | 1.49     | 0.81        | green  | 61.5             | 0.81     | 2.48               | -0.71            | 17.73                      | -0.50                      | 0                            | -1.30                      | 3.58              | -1.06                   | 213        | 284      | 105      | 258       | 0          | 43.591            | 175                    | 52                     | 10                     | 92        | 266                      | 195                      | 130                      | 0    |      |   |
| 223     | ST322  | ASDP-Rosetta          | ST322_ASDP-Rosetta_u            |         | 20         | 2.28     | 1.50        | green  | 48.0             | 0.79     | 1.96               | 0.03             | 9.89                       | 0.66                       | 0                            | -0.47                      | 5.35              | 0.06                    | 237        | 247      | 79       | 143       | 0          | 39.702            | 189                    | 75                     | 14                     | 92        | 275                      | 225                      | 177                      | 0    |      |   |
| 220     | ST322  | autonee-Rosetta-alpha | ST322_autonee-Rosetta-alpha_u   |         | 10         | 4.34     | 0.44        | green  |                  |          | 1.69               | 1.41             | 0.00                       | 0.62                       | 1.7                          | -1.30                      | 5.83              | -0.06                   | 0          | 0        | 0        | 0         | 0          |                   |                        |                        | 0                      | 0         | 0                        | 0                        | 116                      | 104  | 84   | 0 |
| 231     | ST322  | Cheshire              | ST322_Cheshire_s                |         | 10         | 1.30     | 0.82        | green  |                  |          | 0.70               | 4.47             | 0.65                       | 4.39                       | -3.14                        | 0.5                        | -2.40             | 0.01                    | -2.13      | 0        | 0        | 0         | 0          |                   |                        |                        | 0                      | 0         | 0                        | 190                      | 174                      | 158  | 0    |   |
| 224     | ST322  | CYANA                 | ST322_CYANA_c                   |         | 20         | 2.83     | 0.50        | orange | 60.6             | 0.77     | 1.73               | 0.79             | 6.41                       | -3.34                      | 1.1                          | -3.38                      | -6.44             | -5.32                   | 278        | 296      | 132      | 329       | 0          | 38.716            | 7                      | 0                      | 0                      | 0         | 337                      | 294                      | 238                      | 0    |      |   |
| 221     | ST322  | Ponderosa             | ST322_Ponderosa_r               |         | 20         | 3.69     | 0.25        | orange |                  |          | 0.59               | -0.14            | -2.12                      | 32.37                      | -0.38                        | 0.1                        | -1.46             | -5.92                   | -0.02      | 231      | 178      | 74        | 81         | 0                 | 14.679                 | 74                     | 0                      | 0         | 211                      | 329                      | 286                      | 244  | 0    |   |
| YR313A  | YR313A |                       | YR313A                          |         | 20         |          | 0.97        | green  | 61.2             | 0.87     | 2.70               | -0.58            | 12.18                      | -2.87                      | 0                            | -0.55                      | -1.31             | -0.59                   | 631        | 743      | 413      | 754       | 0          | 49.414            | 74                     | 1                      | 0                      | 122       | 130                      | 37                       | 3                        | 0    |      |   |
| 253     | YR313A | ARIA                  | YR313A_ARIA_c                   |         | 10         | 1.12     | 0.50        | green  | 62.0             | 0.84     | 2.93               | -0.93            | 16.27                      | -1.25                      | 1                            | -0.63                      | -0.77             | -0.83                   | 608        | 1495     | 354      | 655       | 575        | 28.782            | 372                    | 230                    | 105                    | 174       | 163                      | 115                      | 78                       | 0    |      |   |
| 254     | YR313A | ARIA                  | YR313A_ARIA_cr                  |         | 10         | 1.39     | 0.64        | green  | 61.3             | 0.83     | 2.42               | -1.03            | 16.66                      | -3.21                      | 0                            | -1.26                      | -0.49             | -1.24                   | 602        | 1500     | 346      | 616       | 545        | 47.096            | 386                    | 218                    | 123                    | 174       | 417                      | 235                      | 154                      | 112  |      |   |
| 334     | YR313A | ARIA                  | YR313A_ARIA_ur                  | TRUE    | 10         | 14.85    | 12.74       | orange | 68.4             | 0.59     | -2.40              |                  | 34.83                      | -8.83                      |                              | -9.20                      |                   | 822                     | 1408       | 464      | 106      | 519       | 28.661     | 3931              | 3217                   | 2629                   | 174                    | 1139      | 840                      | 643                      | 112                      |      |      |   |
| 315     | YR313A | ASDP-CNS              | YR313A_ASDP-CNS_c               |         | 20         | 1.81     | 0.74        | green  | 54.6             | 0.80     | 2.33               | -2.64            | 27.03                      | -2.08                      | 0.1                          | -1.06                      | -2.78             | -2.01                   | 478        | 555      | 297      | 484       | 0          | 79.991            | 105                    | 4                      | 0                      | 198       | 412                      | 146                      | 51                       | 0    |      |   |
| 276     | YR313A | ASDP-CNS              | YR313A_ASDP-CNS_u               |         | 19         | 1.44     | 1.11        | green  | 51.4             | 0.84     | 2.48               | -1.42            | 20.02                      | -2.24                      | 0.1                          | -0.55                      | -3.12             | -1.36                   | 506        | 529      | 297      | 455       | 0          | 60.701            | 124                    | 7                      | 0                      | 198       | 519                      | 202                      | 99                       | 0    |      |   |
| 316     | YR313A | ASDP-Rosetta          | YR313A_ASDP-Rosetta_c           |         | 20         | 1.75     | 1.06        | green  | 60.0             | 0.83     | 2.82               | -0.18            | 10.02                      | -0.19                      | 0                            | 0.20                       | 4.65              | 1.06                    | 487        | 558      | 301      | 475       | 0          | 77.327            | 259                    | 82                     | 25                     | 198       | 211                      | 149                      | 103                      | 0    |      |   |
| 277     | YR313A | ASDP-Rosetta          | YR313A_ASDP-Rosetta_u           |         | 20         | 1.45     | 0.75        | green  | 48.3             | 0.84     | 2.97               | -0.11            | 9.98                       | -0.03                      | 0.1                          | 0.12                       | 4.07              | 0.83                    | 506        | 529      | 297      | 455       | 0          | 60.701            | 395                    | 306                    | 241                    | 198       | 139                      | 90                       | 66                       | 0    |      |   |
| 285     | YR313A | autonee-Rosetta-alpha | YR313A_autonee-Rosetta-alpha_ur |         | 10         | 1.20     | 0.75        | green  |                  |          | 3.83               | 0.83             | 3.82                       | -0.90                      | 0                            | -0.04                      | 6.40              | 1.30                    | 0          | 0        | 0        | 0         | 0          |                   |                        |                        | 0                      | 0         | 0                        | 0                        | 169                      | 138  | 112  | 0 |
| 327     | YR313A | Cheshire              | YR313A_Cheshire_s               |         | 11         | 2.04     |             | green  |                  |          | -1.21              |                  |                            | -3.28                      |                              |                            | -1.84             |                         | 0          | 0        | 0        | 0         | 0          |                   |                        |                        | 0                      | 0         | 40                       | 34                       | 31                       | 0    |      |   |
| 328     | YR313A | Cheshire-YAPP         | YR313A_Cheshire-YAPP_c          |         | 50         | 1.12     | 0.80        | red    |                  |          | 0.86               | 1.10             |                            | 31.19                      | -5.86                        |                            | -7.11             |                         | 0          | 0        | 0        | 0         | 0          |                   |                        |                        | 0                      | 0         | 0                        | 0                        | 2989                     | 2628 | 2301 | 0 |
| 261     | YR313A | Cheshire-YAPP         | YR313A_Cheshire-YAPP_u          |         | 100        | 1.73     | 1.53        | orange |                  |          | 0.82               | 1.14             | -6.95                      | 21.30                      | -3.19                        | 1.5                        | -0.63             | -7.88                   | -4.44      | 0        | 0        | 0         | 0          |                   |                        |                        | 0                      | 0         | 0                        | 0                        | 1605                     | 1123 | 821  | 0 |
| 282     | YR313A | CS-HM-Rosetta         | YR313A_CS-HM-Rosetta_sr         |         | 1          | 2.17     |             | orange |                  |          | -0.37              | 0.64             | 5.19                       | -2.72                      | 0                            | -1.02                      | 6.03              | 0.06                    | 0          | 0        | 0        | 0         |            |                   |                        | 0                      | 0                      | 0         | 31                       | 22                       | 16                       | 0    |      |   |
| 260     | YR313A | CYANA                 | YR313A_CYANA_c                  |         | 20         | 1.21     | 0.67        | green  | 64.3             | 0.86     | 1.84               | 0.96             | 3.70                       | -2.88                      | 0.3                          | -1.46                      | -4.65             | -2.78                   | 626        | 324      | 389      | 778       | 0          | 82.907            | 51                     | 0                      | 0                      | 0         | 545                      | 424                      | 338                      | 0    |      |   |
| 228     | YR313A | Ponderosa             | YR313A_Ponderosa_r              |         | 20         | 1.67     | 0.12        | green  |                  |          | 0.78               | -3.21            | 27.18                      | -0.80                      | 0                            | -0.43                      | -6.48             | -2.90                   | 638        | 723      | 426      | 737       | 0          | 73.187            | 14                     | 2                      | 0                      | 412       | 586                      | 523                      | 440                      | 0    |      |   |
| 237     | YR313A | UNIO                  | YR313A_UNIO_r                   |         | 20         | 2.94     | 1.81        | red    | 40.7             | 0.82     | -0.24              | -2.71            | 24.38                      | -4.85                      | 0.1                          | -1.46                      | -7.07             | -4.49                   | 291        | 529      | 102      | 192       | 0          | 27.243            | 264                    | 77                     | 47                     | 314       | 1315                     | 1177                     | 1031                     | 0    |      |   |
